## Correction: Mixed subtype thyroid cancer: A surveillance, epidemiology, and end results database analysis

Chunping Liu<sup>1,\*</sup>, Qiuyang Zhao<sup>1,\*</sup>, Zhi Li<sup>1</sup>, Shuntao Wang<sup>1</sup>, Yiquan Xiong<sup>1</sup>, Zeming Liu<sup>1,\*</sup> and Tao Huang<sup>1</sup>

<sup>1</sup> Department of Breast and Thyroid Surgery, Union Hospital, Tongji Medical College, Huazhong University of Science and Technology, Wuhan 430022, China

\* These authors have contributed equally to this work

**Published:** March 23, 2018

**This article has been corrected:** The proper name of the institution is as follows:

<sup>1</sup> Department of Breast and Thyroid Surgery, Union Hospital, Tongji Medical College, Huazhong University of Science and Technology, Wuhan 430022, China

Original article: Oncotarget. 2017; 8:86556-86565. <https://doi.org/10.18632/oncotarget.21242>
